# Supplementary material
Source: Springer Nature journal article supplement (https://www.springermedizin.de/resource/supplementary/12883_2012_590_MOESM4_ESM.pdf/9455772)

| Study           | Early Seizure Incidence |       | Odds Ratio (95 CI%)      |
|-----------------|-------------------------|-------|--------------------------|
|                 | PHY                     | LEV   |                          |
| Jones 2008      | 0/41                    | 1/32  | 0.253 (0.010 - 6.421)    |
| Milligan 2008   | 11/210                  | 2/105 | 2.847 (0.619 - 13.085)   |
| Szaflarski 2010 | 3/18                    | 5/34  | 1.160 (0.243 - 5.527)    |
| Taylor 2010     | 2/25                    | 0/60  | 12.872 (0.595 - 278.270) |
| POOLED          | 16/294                  | 8/231 | 1.864 (0.605 - 5.748)    |

(I-squared = 17.4 % p = 0.304)

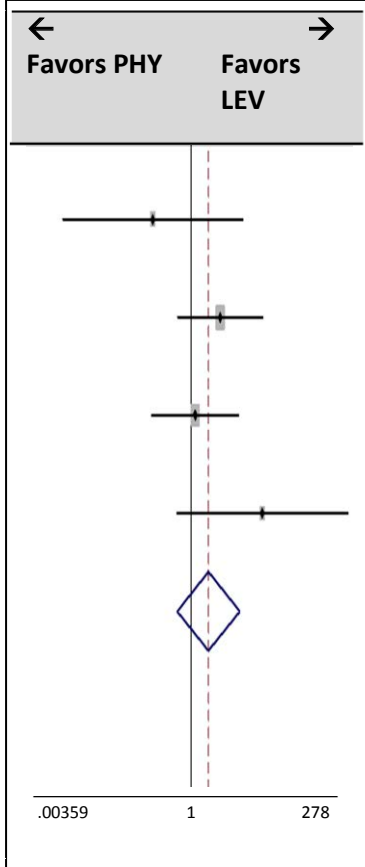

| Study           | Early Seizure Incidence |       | Odds Ratio (95 CI%)      |
|-----------------|-------------------------|-------|--------------------------|
|                 | PHY                     | LEV   |                          |
| Jones 2008      | 0/41                    | 1/32  | 0.253 (0.010 - 6.421)    |
| Milligan 2008   | 11/210                  | 2/105 | 2.847 (0.619 – 13.085)   |
| Szaflarski 2010 | 3/18                    | 5/34  | 1.160 (0.243 - 5.527)    |
| Taylor 2010     | 2/25                    | 0/60  | 12.872 (0.595 - 278.270) |
| POOLED          | 16/294                  | 8/231 | 1.864 (0.605 – 5.748)    |

(I-squared = 17.4 % p = 0.304)

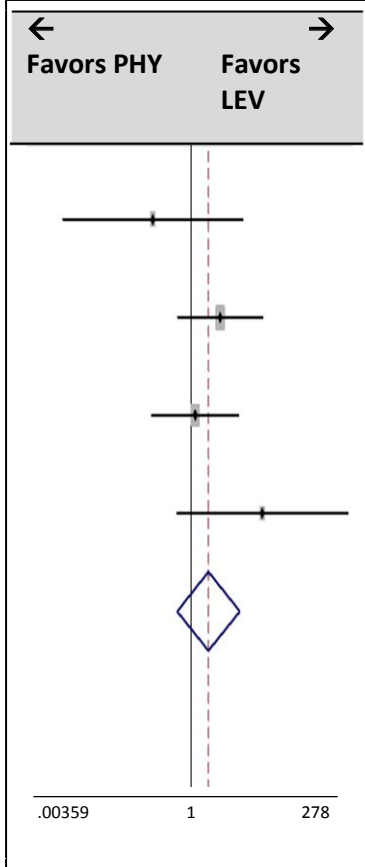

Supplement: MOESM4 [file 9455772]
